# Supplementary material
Source: publisher site journal article supplement (https://www.spandidos-publications.com/418/downloadSupplementary)

Figure S1. Role of NEAT1 in the invasion of anaplastic thyroid carcinoma cells. (A) SW1736 and (B) 8505C cells were transfected with Scramble, siNEAT1, Vector or Vector-NEAT1, and cell invasion was measured using a Transwell assay. \*P<0.05 as indicated. NEAT1, nuclear paraspeckle assembly transcript 1; si, small interfering RNA.

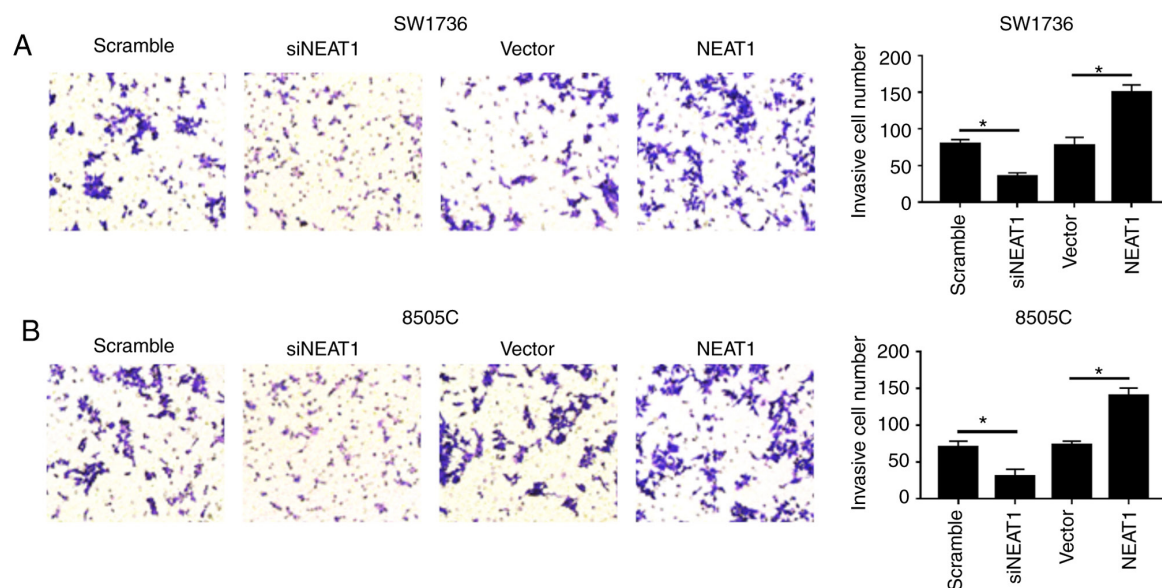

Figure S2. Transfection efficiency of Vector-NEAT1, Vector-SPAG9 and anti-miR-9-5p alone by qRT-PCR. (A) NEAT1 expression in SW1736 and 8505C cells transfected with blank control, Vector-NC or Vector-NEAT1. (B) The expression of anti-miR-9-5p in SW1736 and 8505C cells transfected with blank control, anti-NC or anti-miR-9-5p. (C) SPAG9 mRNA level in SW1736 and 8505C cells transfected with blank control, Vector-NC or Vector-SPAG9.

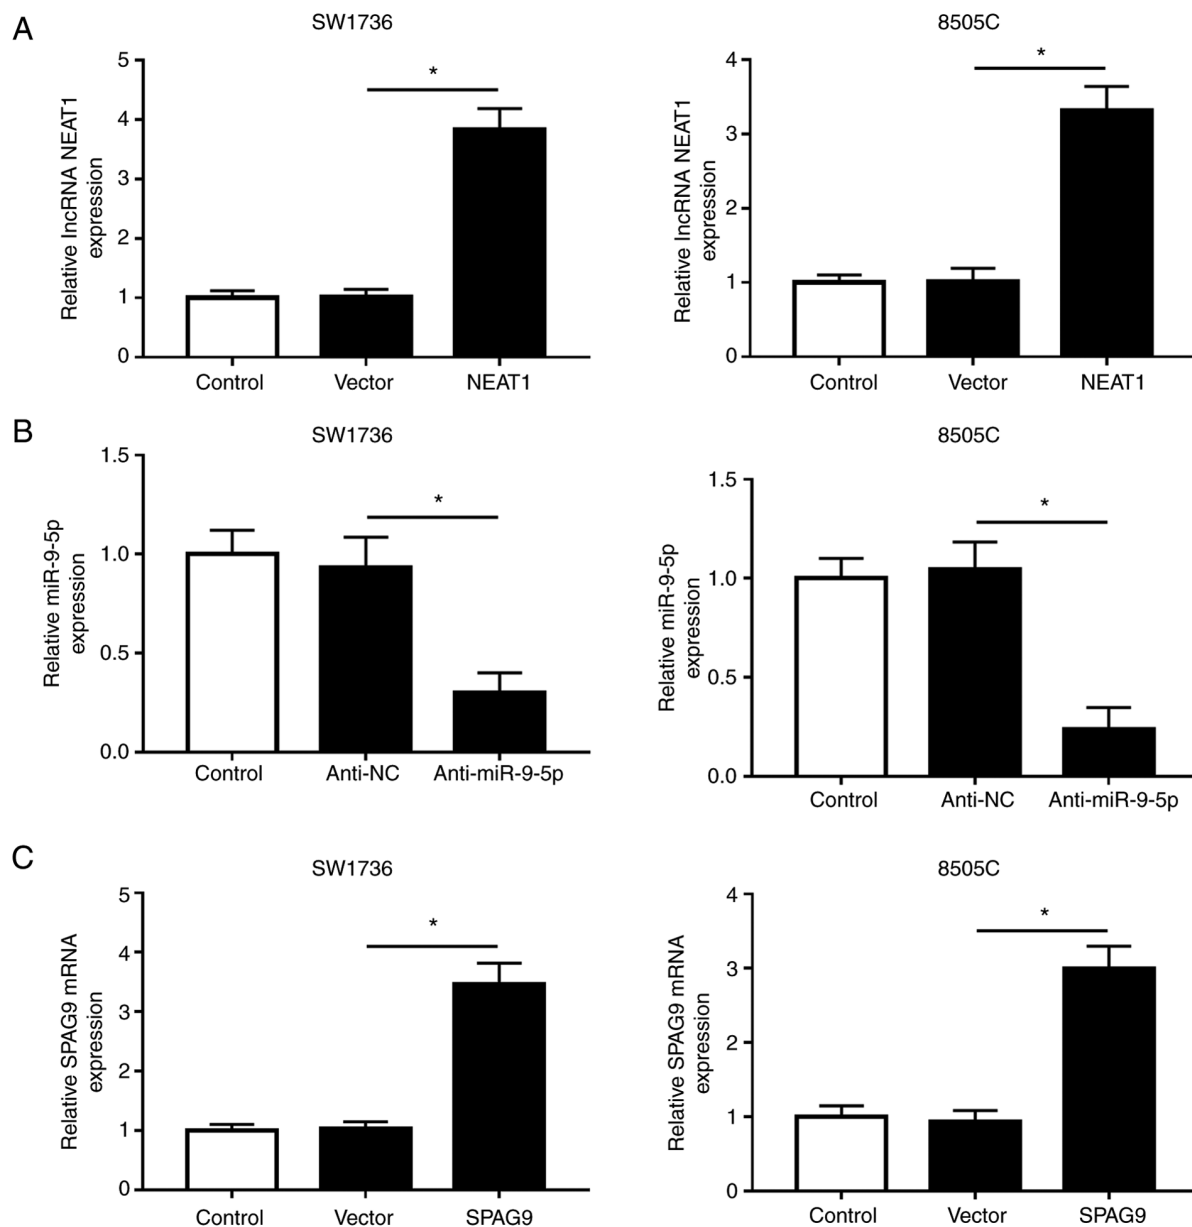

Supplement: Supplementary file 1 [file downloadSupplementary]
